# Supplementary material
Source: PubMed Central journal article supplement (PMC6312382)

SBH030209B2-2D\_11Mar2009

Archive directory: /export/home/huang52/vnmr-sys/data  
Sample directory: SBH030209B2-2D\_11Mar2009

Pulse Sequence: HMQC

Solvent: CD3OD  
Temp: 25.0 C / 298.1 K  
File: HMQC  
INOVA-500 "u1500"

Relax. delay 1.000 sec  
Acq. time 0.171 sec  
Width 6000.0 Hz  
2D Width 21361.8 Hz  
8 repetitions  
2 x 256 increments  
OBSERVE H1, 499.7307698 MHz  
DECOUPLE C13, 125.6667963 MHz  
power 49 db  
on during acquisition  
off during delay  
W40\_hcx4785 modulated  
DATA PROCESSING  
Gauss apodization 0.079 sec  
F1 DATA PROCESSING  
Gauss apodization 0.022 sec  
Ft size 2048 x 4096  
Total time 1 hr, 23 min, 8 sec

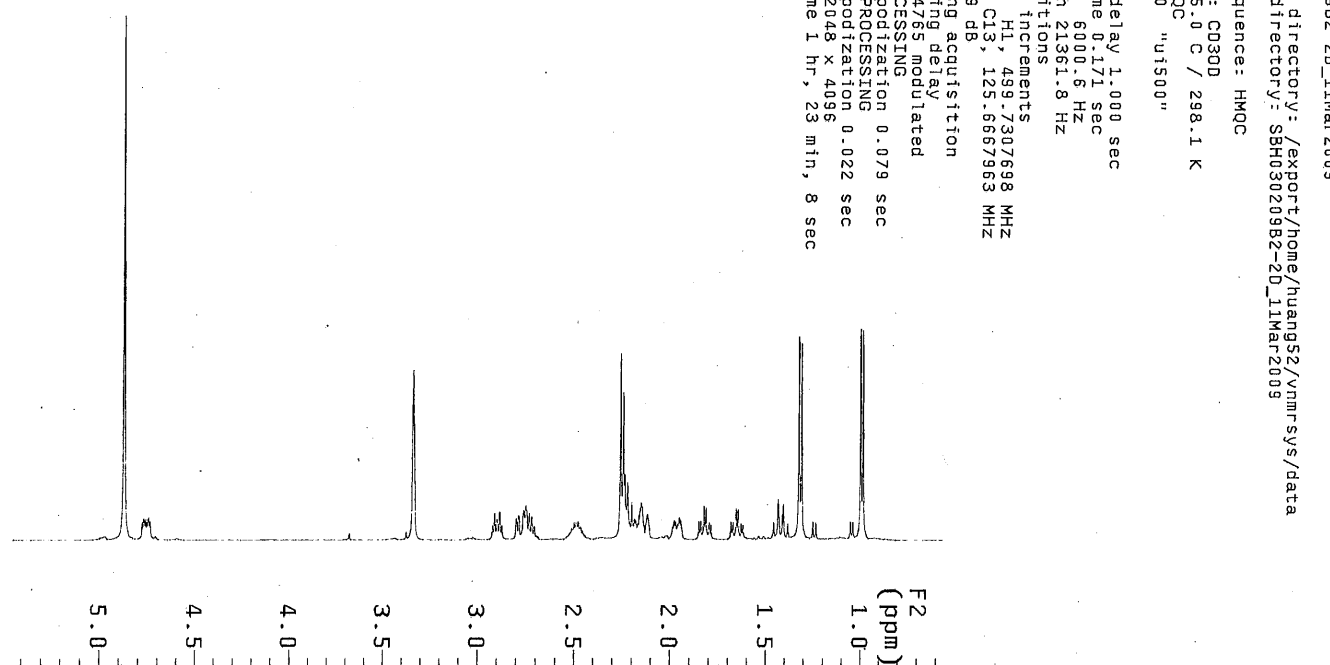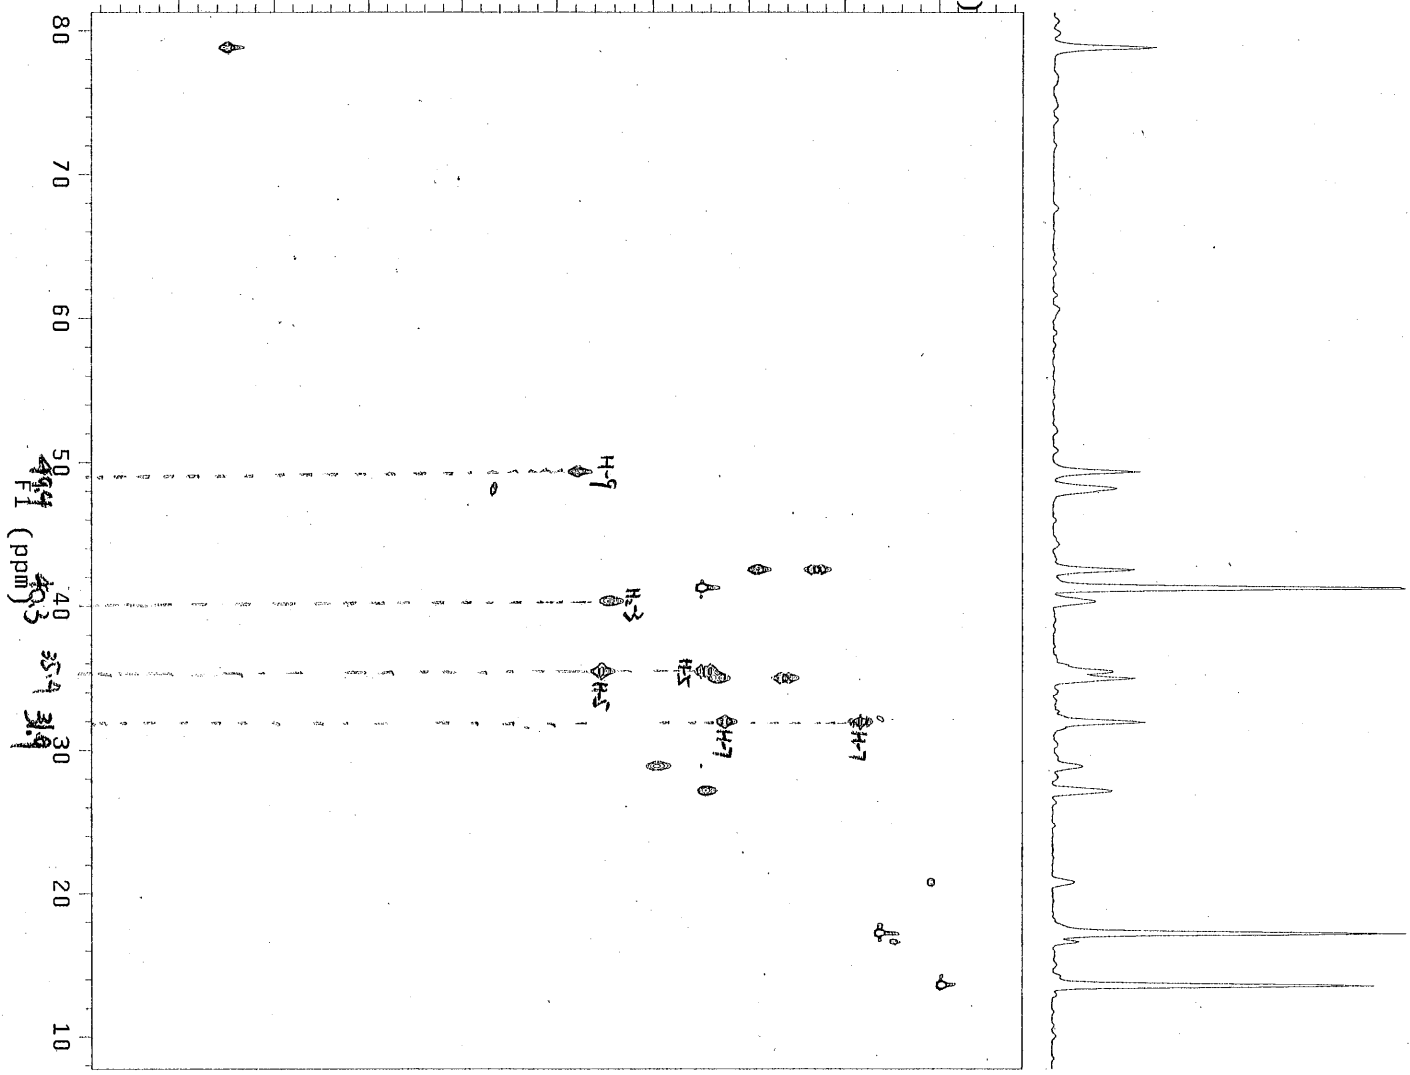

Supplement: NIHMS1000522-supplement-Supplementary_Data.pdf [file NIHMS1000522-supplement-Supplementary_Data.pdf]
